# Supplementary material for: Proximity hybridization triggered rolling-circle amplification for sensitive electrochemical homogeneous immunoassay
Source: Royal Society of Chemistry journal article supplement (doi:10.1039/c7an01434a), 2017-01-01
Supplement: c7an01434a1.pdf [file c7an01434a1.pdf]

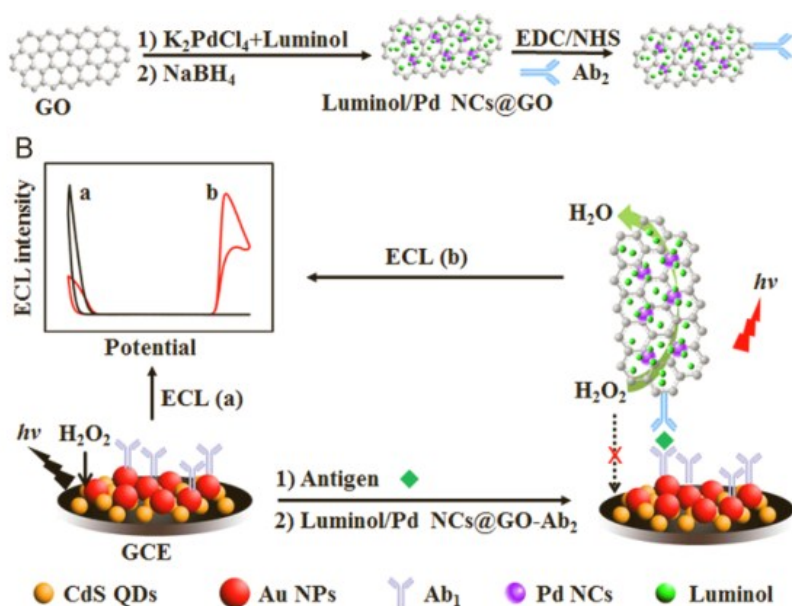

Reference 60. Scheme 1. Schematic illustration of (A) the synthesis of luminol/Pd NCs@GO-Ab<sub>2</sub> probe, (B) ratiometric ECL approach regulated by electrocatalysis of Pd NCs for highly sensitive detection of CEA.

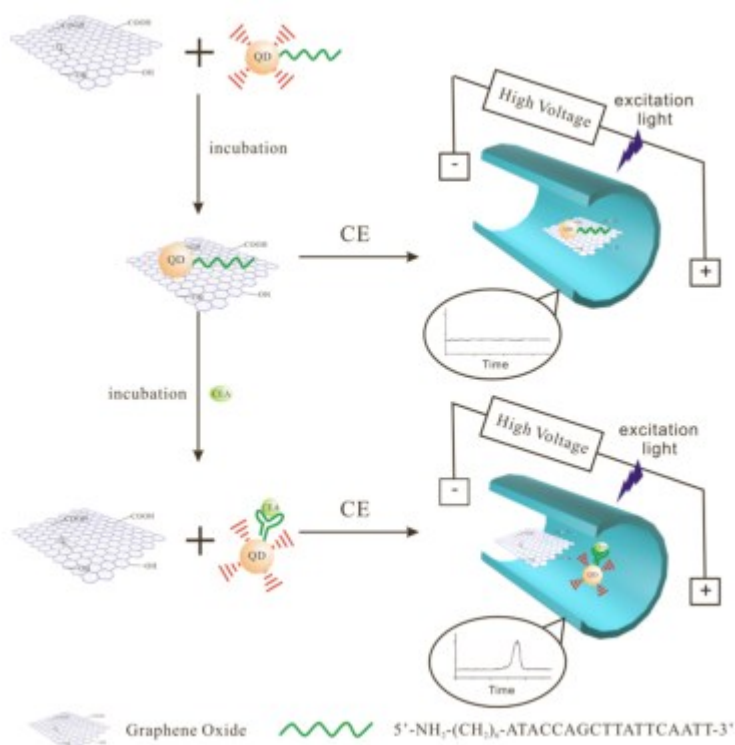

Reference 61. Scheme 2. Schematic depiction of detection of CEA based on GO/Aptasensor by CE.
